# Supplementary material for: Breast cancer incidence and mortality in women in China: temporal trends and projections to 2030
Source: PubMed Central journal article supplement (PMC8330522; doi:10.20892/j.issn.2095-3941.2020.0523), 2021-08-15
Supplement: cbm-18-900-s001.pdf [file cbm-18-900-s001.pdf]

# Supplementary materials

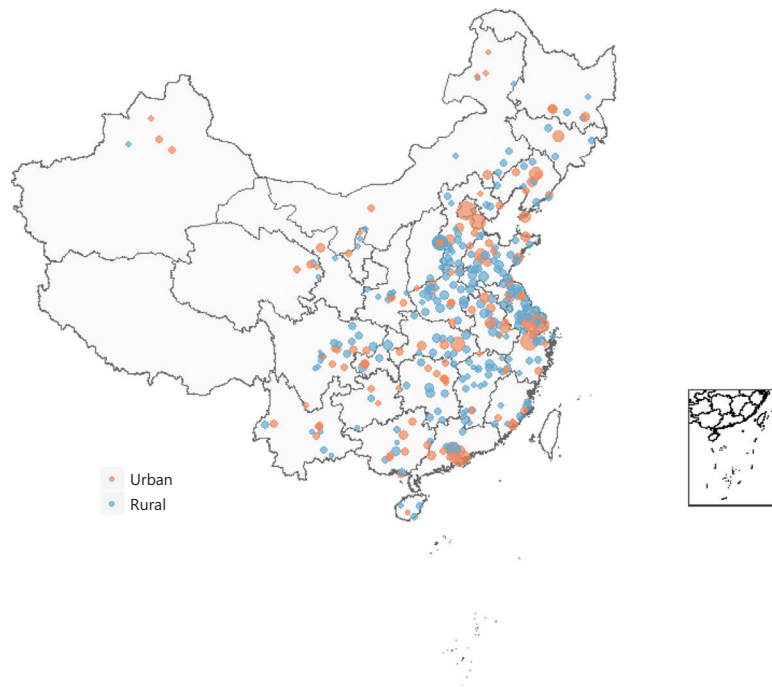

**Figure S1** Distribution of 368 cancer registries in China. The map was obtained from Basic Geographic Information Data of China.

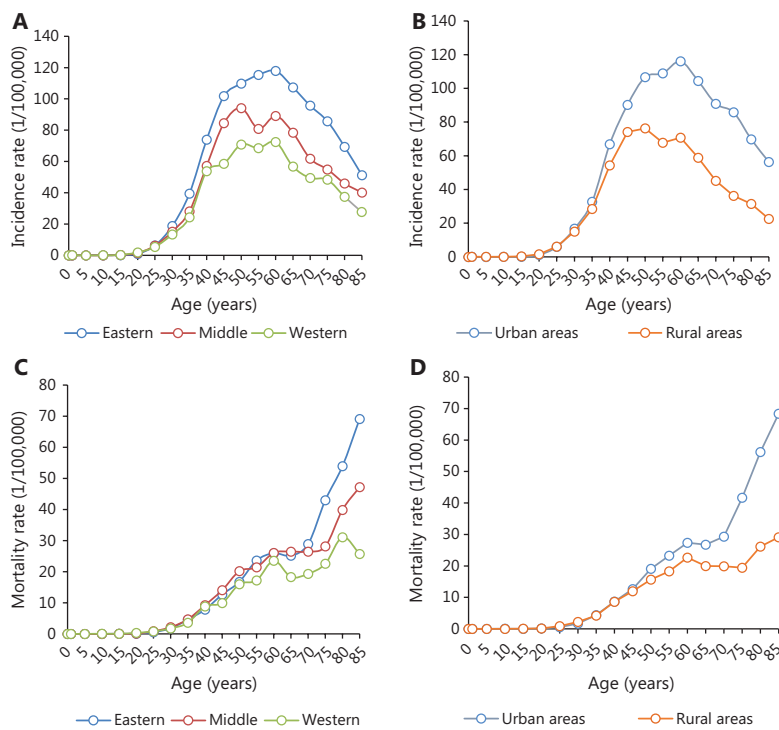

**Figure S2** Age-specific incidence and mortality of breast cancer in women in different areas in China, 2015. (A and B) Incidence in the different areas; (C and D) mortality in the different areas.

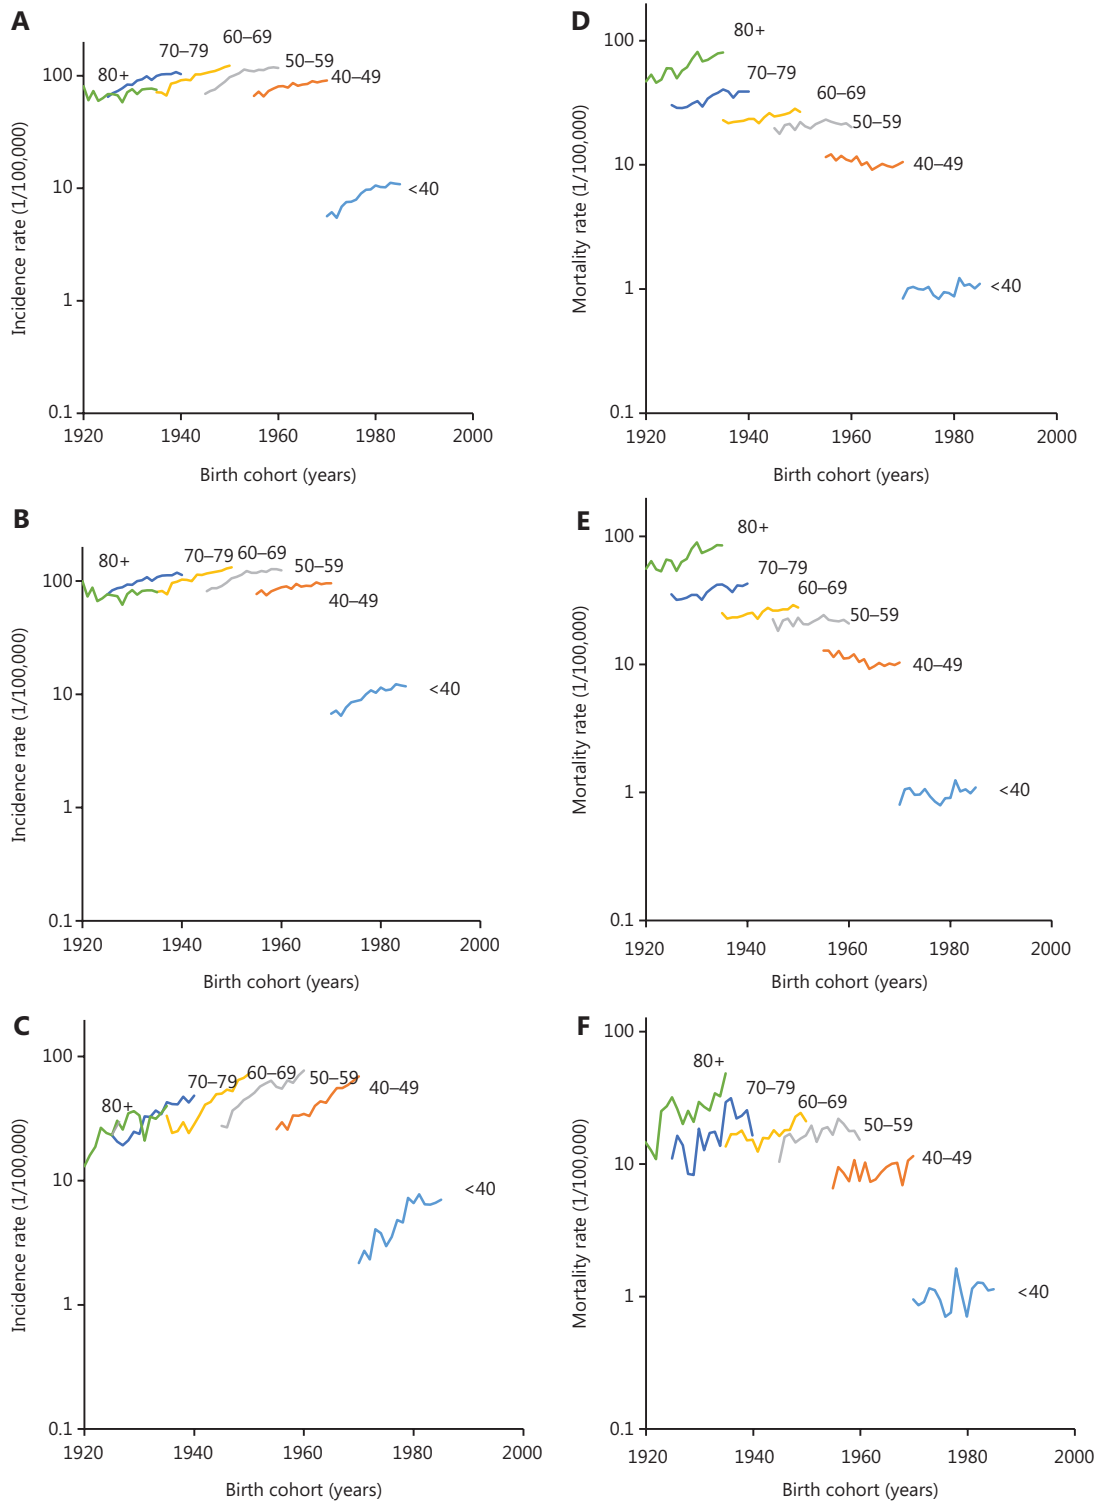

**Figure S3** Breast cancer incidence and mortality rates with different birth cohorts by age group in China. (A) Total incidence; (B) urban incidence; (C) rural incidence; (D) total mortality; (E) urban mortality; (F) rural mortality.

**Table S1** Quality control index of breast cancer in women in China in 2015

| Areas        | M/I  | MV%   | DCO% | UB%  |
|--------------|------|-------|------|------|
| Total        | 0.24 | 88.35 | 0.61 | 0.12 |
| Urban areas  | 0.23 | 89.22 | 0.69 | 0.15 |
| Rural areas  | 0.25 | 87.09 | 0.48 | 0.09 |
| East areas   | 0.23 | 89.75 | 0.65 | 0.10 |
| Middle areas | 0.27 | 86.69 | 0.51 | 0.01 |
| West areas   | 0.26 | 83.85 | 0.55 | 0.57 |

M/I, mortality to incidence rate ratio; MV%, percentage of proportion with morphological verification; DCO%, percentage of proportion with death certification only; UB%, percentage of proportion with unclear diagnosis.

**Table S2** Breast cancer incidence trends by area and age, 2000–2015

| Areas       | Age (years) | Trend 1   |       | Trend 2   |       | Trend 3   |      | AAPC 2000–2015 |
|-------------|-------------|-----------|-------|-----------|-------|-----------|------|----------------|
|             |             | Period    | APC   | Period    | APC   | Period    | APC  |                |
| All areas   | ASIR        | 2000–2006 | 5.3*  | 2006–2015 | 1.9*  |           |      | 3.3*           |
| All areas   | <40         | 2000–2009 | 7.0*  | 2009–2015 | 1.6*  |           |      | 4.8*           |
| All areas   | 40–49       | 2000–2015 | 2.0*  |           |       |           |      | 2.0*           |
| All areas   | 50–59       | 2000–2007 | 6.8*  | 2007–2015 | 1.2*  |           |      | 3.8*           |
| All areas   | 60–69       | 2000–2015 | 3.9*  |           |       |           |      | 3.9*           |
| All areas   | 70–79       | 2000–2007 | 5.3*  | 2007–2015 | 1.5*  |           |      | 3.3*           |
| All areas   | 80+         | 2000–2015 | 0.8   |           |       |           |      | 0.8            |
| Urban areas | ASIR        | 2000–2008 | 3.7*  | 2008–2015 | 1.2*  |           |      | 2.6*           |
| Urban areas | <40         | 2000–2008 | 6.2*  | 2008–2015 | 2.1   |           |      | 4.3*           |
| Urban areas | 40–49       | 2000–2015 | 1.5*  |           |       |           |      | 1.5*           |
| Urban areas | 50–59       | 2000–2008 | 5.0*  | 2008–2015 | 0.8   |           |      | 3.0*           |
| Urban areas | 60–69       | 2000–2015 | 3.5*  |           |       |           |      | 3.5*           |
| Urban areas | 70–79       | 2000–2007 | 4.1*  | 2007–2015 | 1.5*  |           |      | 2.7*           |
| Urban areas | 80+         | 2000–2015 | 0.1   |           |       |           |      | 0.1            |
| Rural areas | ASIR        | 2000–2015 | 6.9*  |           |       |           |      | 6.9*           |
| Rural areas | <40         | 2000–2015 | 8.5*  |           |       |           |      | 8.5*           |
| Rural areas | 40–49       | 2000–2015 | 6.8*  |           |       |           |      | 6.8*           |
| Rural areas | 50–59       | 2000–2008 | 11.1* | 2008–2011 | –4.5  | 2011–2015 | 8.0* | 7.0*           |
| Rural areas | 60–69       | 2000–2002 | –12.4 | 2002–2015 | 9.2*  |           |      | 6.0*           |
| Rural areas | 70–79       | 2000–2002 | –8.8* | 2002–2008 | 11.5* | 2008–2015 | 3.8* | 5.0*           |
| Rural areas | 80+         | 2000–2015 | 5.5*  |           |       |           |      | 5.5*           |

APC, annual percentage change; AAPC, average annual percentage change; ASIR, age-standardized incidence rate using Segi's world standard population; \*, The APC or AAPC is significantly different from zero ( $P < 0.05$ ).

**Table S3** Breast cancer incidence trends by histological type, 2008–2015

| Histological subtype       | Trend 1   |        | Trend 2   |      | AAPC<br>2008–2015 |
|----------------------------|-----------|--------|-----------|------|-------------------|
|                            | Period    | APC    | Period    | APC  |                   |
| Invasive ductal carcinoma  | 2008–2012 | 5.6*   | 2012–2015 | -1.7 | 3.9*              |
| Invasive lobular carcinoma | 2008–2011 | 7.1    | 2011–2015 | -6.8 | -1.1              |
| Paget's disease            | 2008–2015 | 12.1*  |           |      | 12.1*             |
| Medullary carcinoma        | 2008–2015 | -11.2* |           |      | -11.2*            |

APC, annual percentage change; AAPC, average annual percentage change; ASMR, age-standardized mortality rate using Segi's world standard population; \*, The APC or AAPC is significantly different from zero ( $P < 0.05$ ).

**Table S4** Breast cancer mortality trends by area and age, 2000–2015

| Areas       | Age<br>(years) | Trend 1   |       | Trend 2   |      | Trend 3   |      | AAPC 2000–2015 |
|-------------|----------------|-----------|-------|-----------|------|-----------|------|----------------|
|             |                | Period    | APC   | Period    | APC  | Period    | APC  |                |
| All areas   | ASMR           | 2000–2015 | 1.0*  |           |      |           |      | 1.0*           |
| All areas   | <40            | 2000–2015 | 0.9   |           |      |           |      | 0.9            |
| All areas   | 40–49          | 2000–2015 | -1.3* |           |      |           |      | -1.3*          |
| All areas   | 50–59          | 2000–2015 | 0.7   |           |      |           |      | 0.7            |
| All areas   | 60–69          | 2000–2015 | 1.5*  |           |      |           |      | 1.5*           |
| All areas   | 70–79          | 2000–2015 | 2.4*  |           |      |           |      | 2.4*           |
| All areas   | 80+            | 2000–2015 | 3.8*  |           |      |           |      | 3.8*           |
| Urban areas | ASMR           | 2000–2015 | 0.6*  |           |      |           |      | 0.6*           |
| Urban areas | <40            | 2000–2015 | 0.7   |           |      |           |      | 0.7            |
| Urban areas | 40–49          | 2000–2015 | -1.8* |           |      |           |      | -1.8*          |
| Urban areas | 50–59          | 2000–2015 | 0.3   |           |      |           |      | 0.3            |
| Urban areas | 60–69          | 2000–2015 | 1.3*  |           |      |           |      | 1.3*           |
| Urban areas | 70–79          | 2000–2015 | 1.9*  |           |      |           |      | 1.9*           |
| Urban areas | 80+            | 2000–2015 | 3.2*  |           |      |           |      | 3.2*           |
| Rural areas | ASMR           | 2000–2015 | 2.7*  |           |      |           |      | 2.7*           |
| Rural areas | <40            | 2000–2015 | 1.7   |           |      |           |      | 1.7            |
| Rural areas | 40–49          | 2000–2015 | 1.6   |           |      |           |      | 1.6            |
| Rural areas | 50–59          | 2000–2015 | 2.0*  |           |      |           |      | 2.0*           |
| Rural areas | 60–69          | 2000–2002 | 13.3  | 2002–2006 | -6.4 | 2006–2015 | 6.0* | 3.5            |
| Rural areas | 70–79          | 2000–2015 | 5.8*  |           |      |           |      | 5.8*           |
| Rural areas | 80+            | 2000–2015 | 6.3*  |           |      |           |      | 6.3*           |

APC, annual percentage change; AAPC, average annual percentage change; ASMR, age-standardized mortality rate using Segi's world standard population; \*, The APC or AAPC is significantly different from zero ( $P < 0.05$ ).

**Table S5** Annual population of women in 10-year age groups, by region, 2016–2030 in China (thousands)

| Region | Year | <40     | 40–49   | 50–59   | 60–69  | 70–79  | 80+    |
|--------|------|---------|---------|---------|--------|--------|--------|
| Total  | 2016 | 338,327 | 128,008 | 97,564  | 70,226 | 35,025 | 18,848 |
| Total  | 2017 | 340,077 | 128,670 | 98,069  | 70,589 | 35,207 | 18,946 |
| Total  | 2018 | 341,755 | 129,305 | 98,553  | 70,938 | 35,380 | 19,039 |
| Total  | 2019 | 343,324 | 129,899 | 99,005  | 71,263 | 35,543 | 19,127 |
| Total  | 2020 | 344,757 | 130,441 | 99,419  | 71,561 | 35,691 | 19,207 |
| Total  | 2021 | 346,045 | 130,928 | 99,790  | 71,828 | 35,824 | 19,278 |
| Total  | 2022 | 347,187 | 131,360 | 100,120 | 72,065 | 35,943 | 19,342 |
| Total  | 2023 | 348,193 | 131,741 | 100,410 | 72,274 | 36,047 | 19,398 |
| Total  | 2024 | 349,078 | 132,076 | 100,665 | 72,458 | 36,138 | 19,447 |
| Total  | 2025 | 349,858 | 132,371 | 100,890 | 72,619 | 36,219 | 19,491 |
| Total  | 2026 | 350,530 | 132,625 | 101,084 | 72,759 | 36,289 | 19,528 |
| Total  | 2027 | 351,093 | 132,838 | 101,246 | 72,876 | 36,347 | 19,560 |
| Total  | 2028 | 351,552 | 133,012 | 101,378 | 72,971 | 36,395 | 19,585 |
| Total  | 2029 | 351,914 | 133,149 | 101,483 | 73,046 | 36,432 | 19,605 |
| Total  | 2030 | 352,185 | 133,251 | 101,561 | 73,103 | 36,460 | 19,621 |
| Urban  | 2016 | 182,920 | 76,926  | 59,101  | 40,010 | 20,351 | 11,035 |
| Urban  | 2017 | 187,834 | 78,993  | 60,689  | 41,084 | 20,897 | 11,331 |
| Urban  | 2018 | 192,641 | 81,014  | 62,242  | 42,136 | 21,432 | 11,621 |
| Urban  | 2019 | 197,308 | 82,977  | 63,750  | 43,157 | 21,951 | 11,903 |
| Urban  | 2020 | 201,813 | 84,872  | 65,205  | 44,142 | 22,453 | 12,175 |
| Urban  | 2021 | 206,142 | 86,692  | 66,604  | 45,089 | 22,934 | 12,436 |
| Urban  | 2022 | 210,288 | 88,435  | 67,943  | 45,996 | 23,395 | 12,686 |
| Urban  | 2023 | 214,250 | 90,102  | 69,223  | 46,862 | 23,836 | 12,925 |
| Urban  | 2024 | 218,034 | 91,693  | 70,446  | 47,690 | 24,257 | 13,153 |
| Urban  | 2025 | 221,645 | 93,212  | 71,613  | 48,480 | 24,659 | 13,371 |
| Urban  | 2026 | 225,079 | 94,656  | 72,722  | 49,231 | 25,041 | 13,578 |
| Urban  | 2027 | 228,332 | 96,024  | 73,773  | 49,942 | 25,403 | 13,774 |
| Urban  | 2028 | 231,406 | 97,317  | 74,767  | 50,615 | 25,745 | 13,960 |
| Urban  | 2029 | 234,304 | 98,535  | 75,703  | 51,249 | 26,067 | 14,135 |
| Urban  | 2030 | 237,030 | 99,682  | 76,584  | 51,845 | 26,371 | 14,299 |
| Rural  | 2016 | 155,254 | 51,154  | 38,526  | 30,219 | 14,683 | 7,819  |
| Rural  | 2017 | 151,642 | 49,964  | 37,630  | 29,516 | 14,341 | 7,637  |
| Rural  | 2018 | 148,071 | 48,787  | 36,744  | 28,821 | 14,003 | 7,458  |
| Rural  | 2019 | 144,540 | 47,623  | 35,868  | 28,134 | 13,670 | 7,280  |
| Rural  | 2020 | 141,047 | 46,473  | 35,001  | 27,454 | 13,339 | 7,104  |

**Table S5** Continued

| Region | Year | <40     | 40–49  | 50–59  | 60–69  | 70–79  | 80+   |
|--------|------|---------|--------|--------|--------|--------|-------|
| Rural  | 2021 | 137,595 | 45,335 | 34,144 | 26,782 | 13,013 | 6,930 |
| Rural  | 2022 | 134,192 | 44,214 | 33,300 | 26,119 | 12,691 | 6,759 |
| Rural  | 2023 | 130,848 | 43,112 | 32,470 | 25,469 | 12,375 | 6,590 |
| Rural  | 2024 | 127,576 | 42,034 | 31,658 | 24,832 | 12,065 | 6,425 |
| Rural  | 2025 | 124,383 | 40,982 | 30,866 | 24,210 | 11,763 | 6,265 |
| Rural  | 2026 | 121,274 | 39,958 | 30,094 | 23,605 | 11,469 | 6,108 |
| Rural  | 2027 | 118,251 | 38,962 | 29,344 | 23,017 | 11,183 | 5,956 |
| Rural  | 2028 | 115,316 | 37,995 | 28,616 | 22,445 | 10,906 | 5,808 |
| Rural  | 2029 | 112,474 | 37,058 | 27,910 | 21,892 | 10,637 | 5,665 |
| Rural  | 2030 | 109,728 | 36,154 | 27,229 | 21,358 | 10,377 | 5,526 |

**Table S6** List of 368 cancer registries

| Cancer registries               | Cancer registries        | Cancer registries        |
|---------------------------------|--------------------------|--------------------------|
| Beijing Shi                     | Huai'an Qu, Huai'an Shi  | Tengzhou Shi             |
| Rural areas of Beijing Shi      | Huaiyin Qu, Huai'an Shi  | Guangrao Xian            |
| Tianjin Shi                     | Qingpu Qu, Huai'an Shi   | Yantai Shi               |
| Rural areas of Tianjin Shi      | Lianshui Xian            | Zhaoyuan Shi             |
| Shijiazhuang Shi                | Hongze Xian              | Linqu Xian               |
| Rural areas of Shijiazhuang Shi | Xuyi Xian                | Gaomi Shi                |
| Zanhuang Xian                   | Jinhu Xian               | Wenshang Xian            |
| Xinji Shi                       | Tinghu Qu, Yancheng Shi  | Liangshan Xian           |
| Qianxi Xian                     | Yandu Qu, Yancheng Shi   | Ningyang Xian            |
| Qian'an Shi                     | Binhai Xian              | Feicheng Shi             |
| Qinhuangdao Shi                 | Funing Xian              | Rushan Shi               |
| Daming Xian                     | Sheyang Xian             | Laicheng Qu, Laiwu Shi   |
| She Xian                        | Jianhu Xian              | Yinan Xian               |
| Ci Xian                         | Dongtai Shi              | Yishui Xian              |
| Wu'an Shi                       | Dafeng Qu, Yancheng Shi  | Junan Xian               |
| Xingtai Xian                    | Danyang Shi              | Decheng Qu, Dezhou Shi   |
| Lincheng Xian                   | Yangzhong Shi            | Gaotang Xian             |
| Neiqiu Xian                     | Taixing Shi              | Bincheng Qu, Binzhou Shi |
| Ren Xian                        | Hangzhou Shi             | Shan Xian                |
| Baoding Shi                     | Jiangdong Qu, Ningbo Shi | Juye Xian                |
| Wangdu Xian                     | Cixi Shi                 | Xiangfu Qu, Kaifeng Shi  |
| Anguo Shi                       | Lucheng Qu, Wenzhou Shi  | Luoyang Shi              |
| Xuanhua Xian                    | Jiaxing Shi              | Mengjin Xian             |
| Zhangbei Xian                   | Jiashan Xian             | Xin'an Xian              |
| Shuangqiao Qu, Chengdu Shi      | Haining Shi              | Luanchuan Xian           |
| Cangzhou Shi                    | Changxing Xian           | Song Xian                |
| Haixing Xian                    | Shangyu Qu, Shaoxing Shi | Ruyang Xian              |
| Yanshan Xian                    | Yongkang Shi             | Yiyang Xian              |
| Jizhou Shi                      | Kaihua Xian              | Luoning Xian             |
| Yangquan Shi                    | Daishan Xian             | Yanshi Shi               |
| Pingshun Xian                   | Xianju Xian              | Lushan Xian              |
| Yangcheng Xian                  | Longquan Shi             | Linzhou Shi              |
| Shouyang Xian                   | Hefei Shi                | Hebi Shi                 |
| Chifeng(Ulanhad) Shi            | Changfeng Xian           | Huixian Shi              |
| Aohan Qi, Chifeng Shi           | Feidong Xian             | Hualong Qu, Puyang Shi   |

Table S6 Continued

| Cancer registries         | Cancer registries         | Cancer registries        |
|---------------------------|---------------------------|--------------------------|
| Kailu Xian                | Feixi Xian                | Puyang Xian              |
| Naiman Qi                 | Lujiang Xian              | Yuzhou Shi               |
| Hailar Qu, Hulun Buir Shi | Chaohu Shi                | Yuanhui Qu, Luohe Shi    |
| Arun Qi                   | Wuhu Shi                  | Yancheng Qu, Luohe Shi   |
| Ewenkizu Zizhiqi          | Bengbu Shi                | Shaoling Qu, Luohe Shi   |
| Yakeshi Shi               | Ma'anshan Shi             | Sanmenxia Shi            |
| Genhe Shi                 | Tongling Shi              | Fangcheng Xian           |
| Linhe Qu, Bayannur Shi    | Yi'an Qu, Tongling Shi    | Neixiang Xian            |
| Xilin Hot Shi             | Tianchang Shi             | Sui Xian                 |
| Shenyang Shi              | Yingdong Qu, Fuyang Shi   | Yucheng Xian             |
| Faku Xian                 | Yongqiao Qu, Suzhou Shi   | Shihe Qu, Xinyang Shi    |
| Dalian Shi                | Lingbi Xian               | Luoshan Xian             |
| Zhuanghe Shi              | Shou Xian                 | Shenqiu Xian             |
| Anshan Shi                | Mengcheng Xian            | Dancheng Xian            |
| Benxi Shi                 | Jing Xian                 | Xiping Xian              |
| Dandong Shi               | Fuqing Shi                | Jiyuan Shi               |
| Donggang Shi              | Changle Shi               | Wuhan Shi                |
| Yingkou Shi               | Xiamen Shi                | Daye Shi                 |
| Fuxin Shi                 | Tong'an Qu, Xiamen Shi    | Yunyang Qu, Shiyan Shi   |
| Zhangwu Xian              | Hanjiang Qu, Putian Shi   | Yichang Shi              |
| Liaoyang Xian             | Yong'an Shi               | Wufeng Tujiazu Zizhixian |
| Dawa Xian                 | Hui'an Xian               | Jingshan Xian            |
| Jianping Xian             | Changtai Xian             | Zhongxiang Shi           |
| Dehui Shi                 | Xinluo Qu, Longyan Shi    | Yunmeng Xian             |
| Jilin Shi                 | Yongding Qu, Longyan Shi  | Gong'an Xian             |
| Meihekou Shi              | Wanli Qu, Nanchang Shi    | Honghu Shi               |
| Yanji Shi                 | Xinjian Qu, Nanchang Shi  | Macheng Shi              |
| Daoli Qu, Harbin Shi      | Xunyang Qu, Jiujiang Shi  | Jiayu Xian               |
| Nangang Qu, Harbin Shi    | Wuning Xian               | Tongcheng Xian           |
| Xiangfang Qu, Harbin Shi  | Zhanggong Qu, Ganzhou Shi | Enshi Shi                |
| Shangzhi Shi              | Gan Xian                  | Tianmen Shi              |
| Boli Xian                 | Dayu Xian                 | Furong Qu, Changsha Shi  |
| Mudanjiang Shi            | Shangyou Xian             | Tianxin Qu, Changsha Shi |
| Hailin Shi                | Chongyi Xian              | Yuelu Qu, Changsha Shi   |
| Shanghai Shi              | Longnan Xian              | Kaifu Qu, Changsha Shi   |

Table S6 Continued

| Cancer registries           | Cancer registries           | Cancer registries            |
|-----------------------------|-----------------------------|------------------------------|
| Wuxi Shi                    | Xiajiang Xian               | Shifeng Qu, Zhuzhou Shi      |
| Jiangyin Shi                | Anfu Xian                   | Hengdong Xian                |
| Changzhou Shi               | Wanzai Xian                 | Shaodong Xian                |
| Liyang Shi                  | Shanggao Xian               | Yueyanglou Qu, Yueyang Shi   |
| Jintan Shi, Changzhou Shi   | Jing'an Xian                | Wuling Qu, Changde Shi       |
| Suzhou Shi                  | Le'an Xian                  | Cili Xian                    |
| Changshu Shi                | Yihuang Xian                | Ziyang Qu, Yiyang Shi        |
| Zhangjiagang Shi            | Dongxiang Xian              | Linwu Xian                   |
| Kunshan Shi                 | Xinzhou Qu, Shangrao Shi    | Dao Xian                     |
| Taicang Shi                 | Guangfeng Qu, Shangrao Shi  | Xintian Xian                 |
| Nantong Shi                 | Yanshan Xian                | Mayang Miaozu Zizhixian      |
| Hai'an Xian                 | Hengfeng Xian               | Lianyuan Shi                 |
| Rudong Xian                 | Yugan Xian                  | Guangzhou Shi                |
| Qidong Shi                  | Poyang Xian                 | Rural areas of Guangzhou Shi |
| Rugao Shi                   | Wannian Xian                | Wengyuan Xian                |
| Haimen Shi                  | Wuyuan Xian                 | Nanxiong Shi, Shaoguan Shi   |
| Lianyungang Shi             | Jinan Shi                   | Shenzhen Shi                 |
| Ganyu Qu, Lianyungang Shi   | Zhangqiu Shi                | Zhuhai Shi                   |
| Donghai Xian                | Qingdao Shi                 | Nanhai Shi, Foshan Shi       |
| Guanyun Xian                | Huangdao Qu, Qingdao Shi    | Shunde Shi, Foshan Shi       |
| Guannan Xian                | Linzi Qu, Zibo Shi          | Jiangmen Shi                 |
| Shihezi Shi                 | Yiyuan Xian                 | Duanzhou Qu, Zhaoqing Shi    |
| Sihui Shi                   | Heshan Shi                  | Langzhong Shi                |
| Dongguan Shi                | Fusui Xian                  | Changning Xian               |
| Zhongshan Shi               | Wuzhishan Shi               | Guang' an Qu, Guang' an Shi  |
| Luoding Shi                 | Qionghai Shi                | Dazhu Xian                   |
| Jiangnan Qu, Nanning Shi    | Changjiang Lizu Zizhixian   | Yucheng Qu, Ya'an Shi        |
| Xixiangtang Qu, Nanning Shi | Lingshui Lizu Zizhixian     | Mingshan Qu, Ya'an Shi       |
| Binyang Xian                | Wanzhou Qu, Chongqing Shi   | Yingjing Xian                |
| Liuzhou Shi                 | Yuzhong Qu, Chongqing Shi   | Hanyuan Xian                 |
| Guilin Shi                  | Shapingba Qu, Chongqing Shi | Shimian Xian                 |
| Wanxiu Qu, Wuzhou Shi       | Jiulongpo Qu, Chongqing Shi | Tianquan Xian                |
| Cangwu Xian                 | Jiangjin Qu, Chongqing Shi  | Lushan Xian                  |
| Beihai Shi                  | Fengdu Xian                 | Baoxing Xian                 |
| Hepu Xian                   | Qingyang Qu, Chengdu Shi    | Lezhi Xian                   |



Table S6 Continued

| Cancer registries          | Cancer registries          | Cancer registries          |
|----------------------------|----------------------------|----------------------------|
| Gangbei Qu, Guigang Shi    | Longquanyi Qu, Chengdu Shi | Kaiyang Xian               |
| Luocheng Mulaozu Zizhixian | Pengzhou Shi, Chengdu Shi  | Huichuan Qu, Zunyi Shi     |
| Hongta Qu, Yuxi Shi        | Ziliujing Qu, Zigong Shi   | Bijiang Qu, Tongren Shi    |
| Chengjiang Xian            | Renhe Qu, Panzhihua Shi    | Ceheng Xian                |
| Yimen Xian                 | Guanghan Shi               | Fuquan Shi                 |
| Longyang Qu, Baoshan Shi   | Yanting Xian               | Panlong Qu, Kunming Shi    |
| Tengchong Shi              | Jiange Xian                | Guandu Qu, Kunming Shi     |
| Gejiu Shi                  | Chuanshan Qu, Suining Shi  | Xishan Qu, Kunming Shi     |
| Pingbian Miaozu Zizhixian  | Shizhong Qu, Leshan Shi    | Zhongwei Shi               |
| Beilin Qu, Xi'an Shi       | Liangzhou Qu, Wuwei Shi    | Tianshan Qu, Urtimqi Shi   |
| Lianhu Qu, Xi'an Shi       | Xining Shi                 | Karamay Shi                |
| Weiyang Qu, Xi'an Shi      | Ledu Xian, Haidong Shi     | Diqishi                    |
| Yanta Qu, Xi'an Shi        | Huzhu Tuzu Zizhixian       | Xinyuan(Künes) Xian        |
| Hu Xian                    | Xunhua Salarzu Zizhixian   | Shangzhou Qu, Shangluo Shi |
| Gaoling Qu, Xi 'an Shi     | Hainan Zangzu Zizhizhou    | Jingtai Xian               |
| Mei Xian                   | Helan Xian                 | Huinong Qu, Shizuishan Shi |
| Long Xian                  | Dawukou Qu, Shizuishan Shi | Qingtongxia Shi            |
| Jingyang Xian              | Tongguan Xian              |                            |
